# Supplementary material for: Proteomic analysis of plasma total exosomes and placenta-derived exosomes in patients with gestational diabetes mellitus in the first and second trimesters
Source: Research Square preprint supplement (doi:10.21203/rs.3.rs-4946192/v1), 2024-10-16
Supplement: Supplementary file 1 [file 19b4e7406b778c1df2c0d3ab.xlsx]

## Sheet: Table S7
Supplementary Table 7 The BPs associated with the DEPs of plasma total exosome at 12-16 weeks of gestation.
GO_ID	GO_Name	Hit gene	Background gene	Pvalue_adjusted	Genes
GO:0002252	Immune effector process	9	1955	3e-07	TTR, FCGR3A, CFH, IGHV1-2, IGHV5-10-1, CD14, FLG2, IGHV3-64D, HRNR
GO:0016192	Vesicle-mediated transport	11	4559	7.06e-07	TTR, FCGR3A, IGHV1-2, IGHV5-10-1, PRG4, CD14, FLG2, IGHV3-64D, ADIPOQ, CETP, HRNR
GO:0006897	Endocytosis	8	1682	1e-06	FCGR3A, IGHV1-2, IGHV5-10-1, PRG4, CD14, IGHV3-64D, ADIPOQ, CETP
GO:0006909	Phagocytosis	6	597	1.33e-06	FCGR3A, IGHV1-2, IGHV5-10-1, CD14, IGHV3-64D, ADIPOQ
GO:0002443	Leukocyte mediated immunity	7	1227	2.15e-06	TTR, IGHV1-2, IGHV5-10-1, CD14, FLG2, IGHV3-64D, HRNR
GO:0098657	Import into cell	7	1332	3.15e-06	FCGR3A, IGHV1-2, IGHV5-10-1, PRG4, CD14, IGHV3-64D, ADIPOQ
GO:0045321	Leukocyte activation	7	1799	2.08e-05	TTR, IGHV1-2, IGHV5-10-1, CD14, FLG2, IGHV3-64D, HRNR
GO:0002682	Regulation of immune system process	8	2876	2.37e-05	THBS4, FCGR3A, CFH, IGHV1-2, IGHV5-10-1, CD14, IGHV3-64D, ADIPOQ
GO:0002684	Positive regulation of immune system process	7	1979	3.09e-05	THBS4, FCGR3A, CFH, IGHV1-2, IGHV5-10-1, CD14, IGHV3-64D
GO:0001775	Cell activation	7	2174	4.79e-05	TTR, IGHV1-2, IGHV5-10-1, CD14, FLG2, IGHV3-64D, HRNR

## Sheet: Table S8
Supplementary Table 8 The CCs associated with the DEPs of plasma total exosome at 12-16 weeks of gestation.
GO_ID	GO_Name	Hit gene	Background gene	Pvalue_adjusted	Genes
GO:0044421	Extracellular region part	20	5566	1.32e-21	TTR, FBLN1, PEPD, THBS4, FCGR3A, CFH, IGHV1-2, IGHV5-10-1, AFM, RYR2, KRT17, PRG4, IGFALS, KPRP, CD14, FLG2, IGHV3-64D, ADIPOQ, CETP, HRNR
GO:0005576	Extracellular region	21	7506	1.32e-21	TTR, FBLN1, PEPD, THBS4, FCGR3A, CFH, IGHV1-2, PSG5, IGHV5-10-1, AFM, RYR2, KRT17, PRG4, IGFALS, KPRP, CD14, FLG2, IGHV3-64D, ADIPOQ,CETP, HRNR
GO:0005615	Extracellular space	17	4370	9.33e-18	TTR, PEPD, THBS4, FCGR3A, CFH, IGHV1-2, IGHV5-10-1, AFM, KRT17, PRG4, IGFALS, KPRP, CD14, IGHV3-64D, ADIPOQ, CETP, HRNR
GO:0065010	Extracellular membrane-bounded organelle	15	2778	2.54e-17	TTR, PEPD, THBS4, FCGR3A, CFH, AFM, RYR2, KRT17, IGFALS, KPRP, CD14, FLG2, ADIPOQ, CETP, HRNR
GO:0070062	Extracellular exosome	15	2822	2.54e-17	TTR, PEPD, THBS4, FCGR3A, CFH, AFM, RYR2, KRT17, IGFALS, KPRP, CD14, FLG2, ADIPOQ, CETP, HRNR
GO:1903561	Extracellular vesicle	15	2843	2.54e-17	TTR, PEPD, THBS4, FCGR3A, CFH, AFM, RYR2, KRT17, IGFALS, KPRP, CD14, FLG2, ADIPOQ, CETP, HRNR
GO:0043230	Extracellular organelle	15	2849	2.54e-17	TTR, PEPD, THBS4, FCGR3A, CFH, AFM, RYR2, KRT17, IGFALS, KPRP, CD14, FLG2, ADIPOQ, CETP, HRNR
GO:0031988	Membrane-bounded vesicle	15	4218	7.41e-15	TTR, PEPD, THBS4, FCGR3A, CFH, AFM, RYR2, KRT17, IGFALS, KPRP, CD14, FLG2, ADIPOQ, CETP, HRNR
GO:0031982	Vesicle	15	5440	2.78e-13	TTR, PEPD, THBS4, FCGR3A, CFH, AFM, RYR2, KRT17, IGFALS, KPRP, CD14, FLG2, ADIPOQ, CETP, HRNR
GO:0031012	Extracellular matrix	6	1041	1.4e-06	FBLN1, THBS4, PRG4, IGFALS, ADIPOQ, HRNR
