# Supplementary material for: Proteomic analysis of plasma total exosomes and placenta-derived exosomes in patients with gestational diabetes mellitus in the first and second trimesters
Source: Research Square preprint supplement (doi:10.21203/rs.3.rs-4946192/v1), 2024-10-16
Supplement: Supplementary file 2 [file 660b293ff5676e7513fdd371.xlsx]

## Sheet: Sheet5
TableS2. Quantitative protein matches to EXOCarta database
No.	T-EXO-E	T-EXO-M	PLAP-EXO-E	PLAP-EXO-M	T-EXO venn	PLAP-EXO venn	Two sources exosome venn
1	A1BG	A1BG	A1BG	A1BG	A1BG	A1BG	A1BG
2	A2M	A2M	A2M	A2M	A2M	A2M	A2M
3	ABCA13	CRP	-	-	IGLV1-47	-	-
4	ACTC1	ACTB	ACTG1	ABCB6	ACTN1	ACTG1	AFM
5	ACTN1	ACTN1	AFM	ACTG1	ADAMTS13	AFM	AGT
6	ADAM12	CRTAC1	-	-	IGLV1-51	-	-
7	ADAMTS13	ACTR2	AGT	AFM	AFM	AGT	AHSG
8	ADARB1	CSH2	-	-	IGLV2-18	-	-
9	ADIPOQ	CXXC1	-	-	IGLV2-8	-	-
10	AFM	ADAMTS13	AHSG	AGT	AGT	AHSG	ALB
11	AGT	ADGRG6	ALB	AHSG	AHSG	ALB	AMBP
12	AHSG	ADH1B	AMBP	ALB	ALB	AMBP	APCS
13	ALB	AFM	APCS	AMBP	AMBP	APCS	APOA1
14	ALMS1	DCAF1	-	-	IGLV3-10	-	-
15	AMBP	AGT	APOA1	APCS	ANPEP	APOA1	APOA2
16	ANGPTL6	DCDC1	-	-	IGLV3-19	-	-
17	ANK1	AHSG	APOA2	APOA1	ANXA2	APOA2	APOA4
18	ANPEP	ALB	APOA4	APOA2	APCS	APOA4	APOB
19	ANXA2	AMBP	APOB	APOA4	APMAP	APOB	APOC3
20	APCS	ANGPTL3	APOC3	APOB	APOA1	APOC3	APOD
21	APMAP	ANPEP	APOD	APOC3	APOA2	APOD	APOE
22	APOA1	ANXA2	APOE	APOD	APOA4	APOE	APOH
23	APOA2	AOC1	APOH	APOE	APOA5	APOH	APOL1
24	APOA4	APCS	APOL1	APOH	APOB	APOL1	APOM
25	APOA5	APMAP	APOM	APOL1	APOC3	APOM	ATRN
26	APOB	APOA1	ATRN	APOM	APOD	ATRN	AZGP1
27	APOC1	DGCR6	-	-	IGLV4-69	-	-
28	APOC3	APOA2	AZGP1	ATRN	APOE	AZGP1	BTD
29	APOC4	DLG4	-	-	IGLV8-61	-	-
30	APOC4-APOC2	DNAH10	-	-	IGLV9-49	-	-
31	APOD	APOA4	BTD	AZGP1	APOH	BTD	C1QA
32	APOE	APOA5	C1QA	BTD	APOL1	C1QA	C1QB
33	APOF	ENPP2	-	-	LONRF1	-	-
34	APOH	APOB	C1QB	C1QA	APOM	C1QB	C1QC
35	APOL1	APOC3	C1QC	C1QB	ATRN	C1QC	C1R
36	APOM	APOD	C1R	C1QC	AZGP1	C1R	C1RL
37	ARID1B	APOE	C1RL	C1R	BCHE	C1RL	C1S
38	ARID5B	APOH	C1S	C1RL	BTD	C1S	C3
39	ASAH1	APOL1	C3	C1S	C1QA	C3	C4A
40	ASTN2	EXOSC8	-	-	MYH15	-	-
41	ATP5F1A	F12	-	-	MYO9A	-	-
42	ATRN	APOM	C4A	C3	C1QB	C4A	C4BPA
43	AZGP1	ASH1L	C4BPA	C4A	C1QC	C4BPA	C4BPB
44	BCAP29	F13B	-	-	NOTUM	-	-
45	BCHE	ATRN	C4BPB	C4B	C1R	C4BPB	C5
46	BLTP1	FBLN5	-	-	NPHP3	-	-
47	BPIFC	FCGR3A	-	-	OLFM1	-	-
48	BRF1	FETUB	-	-	ORM2	-	-
49	BRWD1	FGL1	-	-	PF4	-	-
50	BTD	AZGP1	C5	C4BPA	C1RL	C5	C6
51	C1QA	BCHE	C6	C4BPB	C1S	C6	C7
52	C1QB	BPIFB1	C7	C5	C3	C7	C8A
53	C1QC	BTD	C8A	C6	C4A	C8A	C8G
54	C1QTNF3-AMACR	GPLD1	-	-	PLB1	-	-
55	C1R	C1QA	C8G	C7	C4B	C8G	C9
56	C1RL	C1QB	C9	C8A	C4BPA	C9	CD5L
57	C1S	C1QC	CD5L	C8G	C4BPB	CD5L	CFH
58	C2	H4C1	-	-	PRG2	-	-
59	C3	C1R	CFH	C9	C5	CFH	CFI
60	C4A	C1RL	CFI	CD14	C6	CFI	CLEC3B
61	C4B	C1S	CLEC3B	CD44	C7	CLEC3B	CLU
62	C4BPA	C3	CLU	CD5L	C8A	CLU	CP
63	C4BPB	C4A	COPB2	CETP	C8G	CP	CPN2
64	C5	C4B	CP	CFH	C9	CPN2	DSP
65	C6	C4BPA	CPN2	CFI	CA1	DSP	ECM1
66	C7	C4BPB	DCD	CKB	CALML5	ECM1	F10
67	C8A	C5	DSP	CLEC3B	CAMP	F10	F2
68	C8B	H6PD	-	-	PROC	-	-
69	C8G	C6	ECM1	CLU	CASP14	F2	F5
70	C9	C7	F10	CP	CAT	F5	F9
71	CA1	C8A	F2	CPN2	CD14	F9	FBLN1
72	CALML5	C8G	F5	DPYSL2	CD44	FBLN1	FCGBP
73	CAMP	C9	F9	DSP	CD5L	FCGBP	FCN3
74	CAPN1	CA1	FBLN1	ECM1	CETP	FCN3	FGA
75	CAPZB	CALML5	FCGBP	F10	CFH	FGA	FGB
76	CASP14	CAMP	FCN3	F2	CFI	FGB	FGG
77	CAT	CASP14	FGA	F5	CLEC3B	FGG	FN1
78	CATSPER4	HABP2	-	-	PSG1	-	-
79	CAVIN2	HEATR5A	-	-	PSG2	-	-
80	CCDC88B	CAT	FGB	F9	CLU	FN1	GC
81	CD14	CD14	FGG	FBLN1	COL6A3	GC	GSN
82	CD36	CD163	FGL2	FCGBP	COMP	GSN	HBA1
83	CD44	CD44	FN1	FCN3	CP	HBA1	HBB
84	CD5L	CD5L	GC	FGA	CPN2	HBB	HP
85	CDC5L	CDC42BPA	GSN	FGB	CTSD	HP	HPR
86	CDH5	IGHD	-	-	PSG3	-	-
87	CETP	CETP	HBA1	FGG	DBH	HPR	HPX
88	CFAP210	IGHMBP2	-	-	PSG4	-	-
89	CFH	CFH	HBB	FN1	DCD	HPX	HRG
90	CFHR1	IGHV1-18	-	-	PSG5	-	-
91	CFHR2	IGHV1-2	-	-	PSG6	-	-
92	CFHR4	IGHV1-24	-	-	PSG9	-	-
93	CFHR5	IGHV1-3	-	-	SAA2-SAA4	-	-
94	CFI	CFI	HBD	GAPDH	DNAH2	HRG	IDH3A
95	CFP	IGHV1-45	-	-	SELENOP	-	-
96	CGB1	IGHV1-46	-	-	SERPINA10	-	-
97	CHADL	IGHV1-58	-	-	SERPINA6	-	-
98	CHN2	IGHV1-69	-	-	SPTA1	-	-
99	CIT	CLASP1	HGFAC	GC	DSC1	IDH3A	IGFALS
100	CLEC3B	CLEC3B	HP	GSN	DSG1	IGFALS	IGFBP3
101	CLU	CLU	HPR	HBA1	DSP	IGFBP3	IGHA1
102	CNDP1	IGHV1-69D	-	-	SRCAP	-	-
103	CNTRL	IGHV1-8	-	-	TNXB	-	-
104	COL6A3	COL12A1	HPX	HBA2	ECM1	IGHA1	IGHA2
105	COLEC10	COL6A1	HRG	HBB	EFEMP1	IGHA2	IGHG1
106	COLEC11	IGHV1OR15-1	-	-	UBE2Q1	-	-
107	COMP	COL6A3	IDH3A	HP	ENO1	IGHG1	IGHG2
108	CORO1C	COMP	IGFALS	HPR	F10	IGHG2	IGHG3
109	CP	CP	IGFBP3	HPX	F11	IGHG3	IGHG4
110	CPB2	IGHV1OR15-9	-	-	VCAM1	-	-
111	CPN1	IGHV2-26	-	-	VPS54	-	-
112	CPN2	CPN2	IGHA1	HRG	F13A1	IGHG4	IGHM
113	CPXM2	IGHV2-5	-	-	ZNF77	-	-
114	CRP	IGHV2-70D	-	-	-	-	-
115	CRTAC1	IGHV3-13	-	-	-	-	-
116	CSH2	IGHV3-15	-	-	-	-	-
117	CTSD	CTSD	IGHA2	HSPA2	F2	IGHM	IGHV3-7
118	DBH	DBH	IGHG1	IDH3A	F5	IGHV3-7	IGKC
119	DCD	DCD	IGHG2	IGFALS	F7	IGKC	IGKV3-20
120	DCDC1	IGHV3-20	-	-	-	-	-
121	DNAH12	DNAH2	IGHG3	IGFBP3	F9	IGKV1-5	IGKV4-1
122	DNAH2	DNAJB11	IGHG4	IGHA1	FBLN1	IGKV3-20	IGLC3
123	DNM1L	DSC1	IGHM	IGHA2	FCGBP	IGKV3D-15	IGLL5
124	DPP4	DSG1	IGHV3-7	IGHG1	FCN2	IGKV4-1	ITIH1
125	DSC1	DSP	IGKC	IGHG2	FCN3	IGLC3	ITIH2
126	DSG1	DYNC1H1	IGKV1-5	IGHG3	FERMT3	IGLL5	ITIH3
127	DSP	ECM1	IGKV3-20	IGHG4	FGA	ITIH1	ITIH4
128	ECM1	EFEMP1	IGKV3D-15	IGHM	FGB	ITIH2	JCHAIN
129	EFEMP1	ENG	IGKV4-1	IGHV3-7	FGG	ITIH3	KNG1
130	EGFL6	IGHV3-21	-	-	-	-	-
131	EHBP1L1	ENO1	IGLC3	IGKC	FLG2	ITIH4	KRT1
132	ENO1	EXT2	IGLL5	IGKV1-5	FLNA	JCHAIN	KRT10
133	ENPP2	IGHV3-23	-	-	-	-	-
134	EPB41	F10	IQGAP3	IGKV3-20	FN1	KNG1	KRT14
135	F10	F11	ITIH1	IGKV3D-15	FUCA2	KRT1	KRT16
136	F11	F13A1	ITIH2	IGKV4-1	GAPDH	KRT10	KRT2
137	F12	IGHV3-30-3	-	-	-	-	-
138	F13A1	F2	ITIH3	IGLC3	GC	KRT14	KRT5
139	F13B	IGHV3-35	-	-	-	-	-
140	F2	F5	ITIH4	IGLL5	GP1BB	KRT16	KRT6A
141	F5	F7	JCHAIN	IGLV3-21	GP5	KRT2	KRT6B
142	F7	F9	JUP	ITIH1	GSN	KRT5	KRT77
143	F9	FAM20C	KMT2D	ITIH2	HBA1	KRT6A	KRT9
144	FBLN1	FBLN1	KNG1	ITIH3	HBB	KRT6B	LCAT
145	FBLN5	IGHV3-38	-	-	-	-	-
146	FCGBP	FCGBP	KRT1	ITIH4	HBD	KRT77	LGALS3BP
147	FCGR3B	IGHV3-38-3	-	-	-	-	-
148	FCN2	FCN2	KRT10	JCHAIN	HGFAC	KRT9	LPA
149	FCN3	FCN3	KRT14	KLKB1	HLA-A	LCAT	LRG1
150	FERMT3	FERMT3	KRT16	KNG1	HP	LGALS3BP	LUM
151	FETUB	IGHV3-43	-	-	-	-	-
152	FGA	FGA	KRT17	KRT1	HPR	LPA	ORM1
153	FGB	FGB	KRT2	KRT10	HPX	LRG1	PGLYRP2
154	FGG	FGG	KRT5	KRT14	HRG	LUM	PLG
155	FGL1	IGHV3-43D	-	-	-	-	-
156	FLG2	FLG2	KRT6A	KRT16	HRNR	ORM1	PLTP
157	FLNA	FLNA	KRT6B	KRT2	HSP90B1	PGLYRP2	PON1
158	FN1	FN1	KRT77	KRT5	HSPA5	PLG	PROS1
159	FUCA2	FUCA2	KRT9	KRT6A	HSPG2	PLTP	PZP
160	GAPDH	GANAB	KTN1	KRT6B	IDH3A	PON1	QSOX1
161	GC	GAPDH	LCAT	KRT77	IGFALS	PROS1	RBP4
162	GP1BB	GC	LGALS3BP	KRT78	IGFBP3	PRSS3	SERPINA1
163	GP5	GP1BB	LPA	KRT9	IGHA1	PZP	SERPINA3
164	GP9	GP5	LRG1	LCAT	IGHA2	QSOX1	SERPINA4
165	GPLD1	IGHV3-48	-	-	-	-	-
166	GSN	GSN	LTF	LCP1	IGHG1	RBP4	SERPINA7
167	H1-4	IGHV3-49	-	-	-	-	-
168	HABP2	IGHV3-53	-	-	-	-	-
169	HBA1	HBA1	LUM	LGALS3BP	IGHG2	SERPINA1	SERPINC1
170	HBB	HBB	MCM9	LGALS7	IGHG3	SERPINA3	SERPIND1
171	HBD	HBD	ORM1	LGALS7B	IGHG4	SERPINA4	SERPINF1
172	HGFAC	HGFAC	PBRM1	LPA	IGHM	SERPINA7	SERPINF2
173	HLA-A	HLA-A	PGLYRP2	LRG1	IGHV3-7	SERPINC1	SERPING1
174	HLA-B	HP	PLG	LUM	IGKC	SERPIND1	SHBG
175	HMGXB4	IGHV3-64	-	-	-	-	-
176	HP	HPR	PLTP	MASP1	IGKV2-24	SERPINF1	TF
177	HPR	HPX	PLXDC2	MASP2	IGKV3-20	SERPINF2	TTN
178	HPX	HRG	PON1	MBL2	IGKV4-1	SERPING1	TTR
179	HRG	HRNR	PROS1	MST1	IGLC3	SHBG	VTN
180	HRNR	HSP90B1	PRSS3	MYCBP2	IGLL5	TF	VWF
181	HSP90AA1	HSPA5	PZP	ORM1	IGLV2-11	TSSK4	APOC1
182	HSP90B1	HSPA8	QSOX1	PAPPA	IGLV3-21	TTN	APOC4
183	HSPA2	HSPG2	RBP4	PCYOX1	ITGA2B	TTR	APOC4-APOC2
184	HSPA5	IDE	SACS	PGLYRP2	ITGB1	VTN	C2
185	HSPG2	IDH3A	SERPINA1	PIGR	ITGB3	VWF	CFHR1
186	IDH3A	IGFALS	SERPINA3	PKM	ITIH1	APOC4	CNDP1
187	IGFALS	IGFBP3	SERPINA4	PLG	ITIH2	CPN1	CPB2
188	IGFBP3	IGHA1	SERPINA7	PLTP	ITIH3	PRG2	CPN1
189	IGHA1	IGHA2	SERPINC1	PON1	ITIH4	F12	F12
190	IGHA2	IGHG1	SERPIND1	PRDX2	JCHAIN	SERPINA6	F13B
191	IGHD	IGHV3-64D	-	-	-	-	-
192	IGHG1	IGHG2	SERPINF1	PRG4	JUP	IGHD	GPLD1
193	IGHG2	IGHG3	SERPINF2	PROS1	KNG1	F13B	HABP2
194	IGHG3	IGHG4	SERPING1	PROZ	KPRP	GPLD1	IGHD
195	IGHG4	IGHM	SHBG	PRSS3	KRT1	ORM2	IGHV1-2
196	IGHM	IGHV3-7	TF	PZP	KRT10	C4B_2	IGHV3-35
197	IGHV1-18	IGHV3-72	-	-	-	-	-
198	IGHV1-2	IGHV3-73	-	-	-	-	-
199	IGHV1-24	IGHV3-74	-	-	-	-	-
200	IGHV1-45	IGHV3-9	-	-	-	-	-
201	IGHV1-46	IGHV3OR16-12	-	-	-	-	-
202	IGHV1-69	IGHV3OR16-13	-	-	-	-	-
203	IGHV1-8	IGHV4-28	-	-	-	-	-
204	IGHV1OR15-1	IGHV4-30-2	-	-	-	-	-
205	IGHV2-26	IGHV4-59	-	-	-	-	-
206	IGHV2-5	IGHV5-10-1	-	-	-	-	-
207	IGHV2-70D	IGHV5-51	-	-	-	-	-
208	IGHV3-13	IGHV6-1	-	-	-	-	-
209	IGHV3-15	IGHV7-81	-	-	-	-	-
210	IGHV3-23	IGKV1-13	-	-	-	-	-
211	IGHV3-30-3	IGKV1-16	-	-	-	-	-
212	IGHV3-35	IGKV1-33	-	-	-	-	-
213	IGHV3-38	IGKV1D-16	-	-	-	-	-
214	IGHV3-38-3	IGKV1D-37	-	-	-	-	-
215	IGHV3-43	IGKV2-30	-	-	-	-	-
216	IGHV3-49	IGKV3-11	-	-	-	-	-
217	IGHV3-53	IGKV3-15	-	-	-	-	-
218	IGHV3-64	IGKV3-7	-	-	-	-	-
219	IGHV3-64D	IGKV3D-20	-	-	-	-	-
220	IGHV3-66	IGKV6D-21	-	-	-	-	-
221	IGHV3-7	IGKC	TSSK4	QSOX1	KRT14	APOC4-APOC2	IGHV3-49
222	IGHV3-72	IGLL1	-	-	-	-	-
223	IGHV3-74	IGLV1-36	-	-	-	-	-
224	IGHV3-9	IGLV1-47	-	-	-	-	-
225	IGHV3OR16-12	IGLV1-51	-	-	-	-	-
226	IGHV3OR16-13	IGLV2-18	-	-	-	-	-
227	IGHV4-28	IGLV2-8	-	-	-	-	-
228	IGHV4-30-2	IGLV3-10	-	-	-	-	-
229	IGHV4-34	IGLV3-19	-	-	-	-	-
230	IGHV4-4	IGLV3-27	-	-	-	-	-
231	IGHV5-10-1	IGLV4-69	-	-	-	-	-
232	IGHV5-51	IGLV5-39	-	-	-	-	-
233	IGHV6-1	IGLV7-43	-	-	-	-	-
234	IGHV7-81	IGLV8-61	-	-	-	-	-
235	IGKC	IGKV2-24	TTN	RBP4	KRT16	IGHV5-51	IGHV3-74
236	IGKV1-13	IGLV9-49	-	-	-	-	-
237	IGKV1-27	ISLR	-	-	-	-	-
238	IGKV1D-16	ITPR1	-	-	-	-	-
239	IGKV1D-37	KDM3B	-	-	-	-	-
240	IGKV2-24	IGKV3-20	TTR	S100A8	KRT17	IGKV3-11	IGHV3OR16-12
241	IGKV2-30	KNL1	-	-	-	-	-
242	IGKV3-11	LCMT2	-	-	-	-	-
243	IGKV3-20	IGKV4-1	UBA52	SAA1	KRT2	CFHR1	IGHV5-51
244	IGKV3-7	LOC400499	-	-	-	-	-
245	IGKV3D-15	IGLC3	VTN	SERPINA1	KRT5	C2	IGKV3-11
246	IGKV3D-20	LONRF1	-	-	-	-	-
247	IGKV4-1	IGLL5	VWF	SERPINA3	KRT6A	CPB2	IGKV3-7
248	IGLC3	IGLV2-11	XPO1	SERPINA4	KRT6B	APOC1	IGKV3D-20
249	IGLL1	LOXHD1	-	-	-	-	-
250	IGLL5	IGLV3-21	APOC4	SERPINA7	KRT77	IGKV3-7	IGLV1-47
251	IGLV10-54	LYVE1	-	-	-	-	-
252	IGLV1-36	MTERF3	-	-	-	-	-
253	IGLV1-47	MYH15	-	-	-	-	-
254	IGLV1-51	MYO1H	-	-	-	-	-
255	IGLV2-11	INTS3	CPN1	SERPINB3	KRT78	PSG9	ORM2
256	IGLV2-18	MYO9A	-	-	-	-	-
257	IGLV2-23	NFE4	-	-	-	-	-
258	IGLV2-8	NOTUM	-	-	-	-	-
259	IGLV3-10	NPHP3	-	-	-	-	-
260	IGLV3-19	OLFM1	-	-	-	-	-
261	IGLV3-21	ITGA2B	ITPR1	SERPINC1	KRT80	CNDP1	PRG2
262	IGLV4-69	ORM2	-	-	-	-	-
263	IGLV6-57	PATJ	-	-	-	-	-
264	IGLV7-46	PDE10A	-	-	-	-	-
265	IGLV8-61	PDIK1L	-	-	-	-	-
266	IGLV9-49	PF4	-	-	-	-	-
267	ILK	ITGB1	PRG2	SERPIND1	KRT9	IGKV1-33	PSG1
268	INPP5D	ITGB3	PRSS1	SERPINF1	LAMA4	IGHV1-3	PSG4
269	ITGA2B	ITIH1	VPS54	SERPINF2	LBP	HABP2	PSG9
270	ITGB1	ITIH2	F12	SERPING1	LCAT	IGLV1-47	SAA2-SAA4
271	ITGB3	ITIH3	C8B	SHBG	LCP1	PSG4	SERPINA6
272	ITIH1	ITIH4	SERPINA6	SPG11	LDHB	SAA2-SAA4	-
273	ITIH2	ITLN1	IGHD	TF	LGALS3BP	PPARA	-
274	ITIH3	JCHAIN	F13B	TGFBI	LPA	IGHV3-74	-
275	ITIH4	JUP	GPLD1	THBS1	LRG1	PSG1	-
276	JCHAIN	KALRN	ORM2	TMCO3	LRP1	IGKV3D-20	-
277	JUP	KNG1	C4B_2	TRANK1	LTF	IGHV3OR16-12	-
278	KLKB1	KPRP	APOC4-APOC2	TRAP1	LUM	IGHV3-49	-
279	KNG1	KRT1	IGHV5-51	TSSK4	LYZ	ART4	-
280	KPRP	KRT10	OSBPL5	TTLL3	MAN1A1	IGHV1-2	-
281	KRT1	KRT13	IGHV4-34	TTN	MAN2A1	IGHV3-35	-
282	KRT10	KRT14	IGKV3-11	TTR	MASP1	-	-
283	KRT14	KRT16	IGLV3-10	TUBA1C	MASP2	-	-
284	KRT16	KRT17	CFHR1	TUBA4A	MBL2	-	-
285	KRT17	KRT2	C2	TUBB4B	MMP2	-	-
286	KRT18	KRT5	CPB2	UBC	MMP9	-	-
287	KRT2	KRT6A	APOC1	VTN	MMRN1	-	-
288	KRT5	KRT6B	SELENOP	VWF	MST1	-	-
289	KRT6A	KRT77	IGKV3-7	APOC4	MYH9	-	-
290	KRT6B	KRT78	IGHV3-43D	CPN1	NID1	-	-
291	KRT71	KRT80	PSG9	FETUB	ORM1	-	-
292	KRT77	KRT9	CNDP1	MBP	PAPPA	-	-
293	KRT78	LAMA4	APOF	MGA	PARVB	-	-
294	KRT8	LAMB1	IGHV6-1	NDUFV2	PCSK9	-	-
295	KRT80	LBP	IGKV2-30	PRG2	PCYOX1	-	-
296	KRT9	LCAT	IGKV1-33	SERPINA10	PEPD	-	-
297	LAMA4	LCP1	IGHV1-3	GPLD1	PGLYRP2	-	-
298	LBP	LDHB	HABP2	PSG9	PIGR	-	-
299	LCAT	LGALS3BP	IGLV7-43	F12	PIP	-	-
300	LCN1P1	LNPEP	NAA20	SERPINA6	PKM	-	-
301	LCP1	LPA	IGLV1-47	IGHD	PLEK	-	-
302	LDHB	LRG1	PSG4	APOC4-APOC2	PLG	-	-
303	LGALS3BP	LRP1	MYH1	IGHV3-30-5	PLTP	-	-
304	LIMS1	LTF	SAA2-SAA4	F13B	PON1	-	-
305	LONRF1	PLA2G7	-	-	-	-	-
306	LPA	LUM	PPARA	ORM2	PON3	-	-
307	LRG1	LYZ	IGHV3-74	PSG1	POSTN	-	-
308	LRP1	MAN1A1	IGHV3OR16-9	CPB2	PPP4R1	-	-
309	LTF	MAN2A1	PSG1	ATP5F1B	PRG4	-	-
310	LUM	MASP1	IGHV4-4	SAA2-SAA4	PROS1	-	-
311	LYZ	MASP2	IGKV3D-20	CNDP1	PROZ	-	-
312	MACF1	MBL2	PSG5	HABP2	PZP	-	-
313	MAN1A1	MCAM	BLTP1	C4B_2	QSOX1	-	-
314	MAN2A1	MMP2	DCDC1	PSG3	RAP1B	-	-
315	MASP1	MMP9	DNAI7	IGHV5-51	RBP4	-	-
316	MASP2	MMRN1	FEM1C	CFHR1	RELN	-	-
317	MAST2	PLB1	-	-	-	-	-
318	MBL2	MPO	RASSF9	C2	S100A8	-	-
319	MEGF8	MST1	MTMR7	IGHV4-59	S100A9	-	-
320	MMP2	MYH9	PLPP7	IGKV3-7	SAA1	-	-
321	MMP9	NAGLU	IGHV3OR16-12	IGKV3D-20	SERPINA1	-	-
322	MMRN1	NCSTN	IGHV3-49	CSH2	SERPINA3	-	-
323	MMRN2	NID1	PTPRN2	IGKV1-6	SERPINA4	-	-
324	MPIG6B	PPP1R37	-	-	-	-	-
325	MSH2	NPR1	ART4	IGHV3-49	SERPINA5	-	-
326	MST1	ORM1	IGHV1-2	CFHR2	SERPINA7	-	-
327	MYH15	PRG2	-	-	-	-	-
328	MYH2	PROC	-	-	-	-	-
329	MYH9	PAPPA	IGHV3-72	BDP1	SERPINB3	-	-
330	MYL12A	PARVB	IGHV3-35	TSEN2	SERPINC1	-	-
331	MYL6	PCSK9	MLPH	IGLV1-47	SERPIND1	-	-
332	MYO9A	PSG1	-	-	-	-	-
333	NID1	PCYOX1	AP4B1	PKP1	SERPINF1	-	-
334	NOTUM	PSG11	-	-	-	-	-
335	NPHP3	PSG2	-	-	-	-	-
336	OBSCN	PEPD	KIF16B	H4C1	SERPINF2	-	-
337	OGDHL	PSG3	-	-	-	-	-
338	OIT3	PGLYRP2	-	IGLV8-61	SERPING1	-	-
339	OLFM1	PSG4	-	-	-	-	-
340	ORM1	PIGR	-	IGLV7-46	SHBG	-	-
341	ORM2	PSG5	-	-	-	-	-
342	PAPPA	PIP	-	PSG4	SLC4A1	-	-
343	PARVB	PKM	-	IGKV2-29	SPP2	-	-
344	PCSK9	PLEK	-	PCNT	SPTB	-	-
345	PCYOX1	PLG	-	TCHH	STOM	-	-
346	PDIA3	PLTP	-	PPARA	TF	-	-
347	PEPD	PON1	-	IGKV1-27	TFRC	-	-
348	PF4	PSG6	-	-	-	-	-
349	PGLYRP2	PON3	-	IGHV3-15	TGFBI	-	-
350	PHLDB1	POSTN	-	INTS6L	THBS1	-	-
351	PIGR	PPP2R1B	-	CFP	THBS4	-	-
352	PIP	PPP4R1	-	IGHV1-3	TLN1	-	-
353	PKD1	PRG4	-	IGHV1-2	TNC	-	-
354	PKM	PROS1	-	IGHV3-74	TPM3	-	-
355	PKP1	PSG9	-	-	-	-	-
356	PLB1	RP1L1	-	-	-	-	-
357	PLEC	PROZ	-	MELK	TTN	-	-
358	PLEK	PZP	-	IGKV3-11	TTR	-	-
359	PLG	QSOX1	-	IGKV1-16	TUBA4A	-	-
360	PLTP	RAP1B	-	ART4	TUBB	-	-
361	PLXNA3	RBP4	-	IGHV1OR15-1	TUBB1	-	-
362	PON1	RELN	-	NUDT6	TXN	-	-
363	PON3	RNGTT	-	RBFOX1	UBE4A	-	-
364	POP1	RYR2	-	IGHV3OR16-12	VCL	-	-
365	POSTN	S100A7	-	IGHV3-64D	VNN1	-	-
366	PPL	S100A8	-	APOC1	VTN	-	-
367	PPP4R1	S100A9	-	IGHV3-35	VWF	-	-
368	PRDM9	SAA2-SAA4	-	-	-	-	-
369	PRDX2	SAA1	-	IGKV1-33	YWHAE	-	-
370	PRDX6	SBSN	-	WDR27	YWHAZ	-	-
371	PRG2	SCMH1	-	-	-	-	-
372	PRG4	SELL	-	LOXHD1	ADAM12	-	-
373	PRKDC	SERPINA1	-	SERPINA2	ADIPOQ	-	-
374	PROC	SELENOP	-	-	-	-	-
375	PROS1	SERPINA3	-	-	APOC1	-	-
376	PROZ	SERPINA4	-	-	APOC4	-	-
377	PSG1	SEPTIN3	-	-	-	-	-
378	PSG2	SERPINA10	-	-	-	-	-
379	PSG3	SERPINA6	-	-	-	-	-
380	PSG4	SERPINB2	-	-	-	-	-
381	PSG5	SHANK1	-	-	-	-	-
382	PSG6	SPARCL1	-	-	-	-	-
383	PSG9	SPEG	-	-	-	-	-
384	PSMB1	SERPINA5	-	-	APOC4-APOC2	-	-
385	PZP	SERPINA7	-	-	APOF	-	-
386	QSOX1	SERPINB3	-	-	C2	-	-
387	RAB1B	SERPINC1	-	-	C8B	-	-
388	RAB27B	SERPIND1	-	-	CDH5	-	-
389	RAP1B	SERPINF1	-	-	CFHR1	-	-
390	RBM12B	SPTA1	-	-	-	-	-
391	RBP4	SERPINF2	-	-	CFHR2	-	-
392	RDH11	SERPING1	-	-	CFHR4	-	-
393	RELN	SHBG	-	-	CFHR5	-	-
394	REV1	SRCAP	-	-	-	-	-
395	RNF175	TNXB	-	-	-	-	-
396	RNF213	SLC4A1	-	-	CFP	-	-
397	RNPEPL1	UBE2Q1	-	-	-	-	-
398	RRM2B	VCAM1	-	-	-	-	-
399	S100A8	SLIT2	-	-	CNDP1	-	-
400	S100A9	SPARC	-	-	CNTRL	-	-
401	SAA1	SPP2	-	-	CPB2	-	-
402	SAA2-SAA4	VPS54	-	-	-	-	-
403	SAG	SPTB	-	-	CPN1	-	-
404	SATB1	SPTBN1	-	-	CRP	-	-
405	SEL1L2	ZNF77	-	-	-	-	-
406	SELENOP	-	-	-	-	-	-
407	SERPINA1	STOM	-	-	CRTAC1	-	-
408	SERPINA10	-	-	-	-	-	-
409	SERPINA3	TCOF1	-	-	CSH2	-	-
410	SERPINA4	TF	-	-	DCDC1	-	-
411	SERPINA5	TFRC	-	-	ENPP2	-	-
412	SERPINA6	-	-	-	-	-	-
413	SERPINA7	TGFBI	-	-	F12	-	-
414	SERPINB3	THBS1	-	-	F13B	-	-
415	SERPINC1	THBS4	-	-	FBLN5	-	-
416	SERPIND1	TLN1	-	-	FETUB	-	-
417	SERPINF1	TNC	-	-	FGL1	-	-
418	SERPINF2	TPM3	-	-	GPLD1	-	-
419	SERPING1	TTN	-	-	HABP2	-	-
420	SHBG	TTR	-	-	IGHD	-	-
421	SLC14A2	-	-	-	-	-	-
422	SLC4A1	TUBA1B	-	-	IGHV1-18	-	-
423	SNRNP200	TUBA4A	-	-	IGHV1-2	-	-
424	SOGA1	TUBB	-	-	IGHV1-24	-	-
425	SPECC1	TUBB1	-	-	IGHV1-45	-	-
426	SPEF2	TXN	-	-	IGHV1-46	-	-
427	SPP2	UBA52	-	-	IGHV1-69	-	-
428	SPTA1	-	-	-	-	-	-
429	SPTB	UBE4A	-	-	IGHV1-8	-	-
430	SPTBN5	UTRN	-	-	IGHV1OR15-1	-	-
431	SRC	VASN	-	-	IGHV2-26	-	-
432	SRCAP	-	-	-	-	-	-
433	SRRD	-	-	-	-	-	-
434	STAB1	-	-	-	-	-	-
435	STOM	VCL	-	-	IGHV2-5	-	-
436	SYDE1	-	-	-	-	-	-
437	SYTL2	VNN1	-	-	IGHV2-70D	-	-
438	TBC1D1	VTN	-	-	IGHV3-13	-	-
439	TDRD3	-	-	-	-	-	-
440	TF	VWF	-	-	IGHV3-15	-	-
441	TFRC	YWHAE	-	-	IGHV3-23	-	-
442	TGFBI	YWHAZ	-	-	IGHV3-30-3	-	-
443	TGM1	AASDH	-	-	IGHV3-35	-	-
444	TGM3	ADAM12	-	-	IGHV3-38	-	-
445	THBS1	ADIPOQ	-	-	IGHV3-38-3	-	-
446	THBS4	ALS2CL	-	-	IGHV3-43	-	-
447	TLN1	ANKRD62	-	-	IGHV3-49	-	-
448	TNC	APOC1	-	-	IGHV3-53	-	-
449	TNXB	-	-	-	-	-	-
450	TPM1	APOC4	-	-	IGHV3-64	-	-
451	TPM3	APOC4-APOC2	-	-	IGHV3-64D	-	-
452	TPM4	APOF	-	-	IGHV3-72	-	-
453	TTF2	-	-	-	-	-	-
454	TTN	BMP1	-	-	IGHV3-74	-	-
455	TTR	BUB1	-	-	IGHV3-9	-	-
456	TUBA4A	C2	-	-	IGHV3OR16-12	-	-
457	TUBA8	C20orf144	-	-	IGHV3OR16-13	-	-
458	TUBB	C8B	-	-	IGHV4-28	-	-
459	TUBB1	CCDC110	-	-	IGHV4-30-2	-	-
460	TXN	CDH5	-	-	IGHV5-10-1	-	-
461	UBE2D3	CEP112	-	-	IGHV5-51	-	-
462	UBE2Q1	-	-	-	-	-	-
463	UBE4A	CFHR1	-	-	IGHV6-1	-	-
464	UBR4	CFHR2	-	-	IGHV7-81	-	-
465	UBR5	-	-	-	-	-	-
466	UROC1	-	-	-	-	-	-
467	VCAM1	-	-	-	-	-	-
468	VCL	CFHR4	-	-	IGKV1-13	-	-
469	VCP	CFHR5	-	-	IGKV1D-16	-	-
470	VNN1	CFP	-	-	IGKV1D-37	-	-
471	VPS13C	CHL1	-	-	IGKV2-30	-	-
472	VPS54	-	-	-	-	-	-
473	VTN	CHPF2	-	-	IGKV3-11	-	-
474	VWF	CNDP1	-	-	IGKV3-7	-	-
475	WDR1	CNTRL	-	-	IGKV3D-20	-	-
476	XP32	-	-	-	-	-	-
477	YWHAE	CPB2	-	-	IGLL1	-	-
478	YWHAZ	CPN1	-	-	IGLV1-36	-	-
479	ZNF77	-	-	-	-	-	-
480	ZNFX1	-	-	-	-	-	-
The bolded is the overlap with EXOCarta database.
