# Supplementary material for: Proteomic analysis of plasma total exosomes and placenta-derived exosomes in patients with gestational diabetes mellitus in the first and second trimesters
Source: Research Square preprint supplement (doi:10.21203/rs.3.rs-4946192/v1), 2024-10-16
Supplement: Supplementary file 3 [file 870dd0821b2ed1514a8e83fc.xlsx]

## Sheet: Sheet1
Supplementary Table 1 Clinical characteristics of controls and patients with GDM
	Group				t-test
	CON-E	GDM-E	CON-M	GDM-M	p value (E)	p value (M)
Sample (n)	12 (4×3)	16 (4×4)	12 (4×3)	16 (4×4)	/	/
Age (years)	27.5±3.61	27.5±3.48	27±1.86	27±3.86	>0.9999	>0.9999
OGTT 0 h glucose (mmol/L)	4.51±0.39	5.29±0.63	4.53±0.31	5.40±0.63	0.0008	0.0002
OGTT 1 h glucose (mmol/L)	7.65±1.43	10.54±0.92	7.38±1.57	11.25±0.97	<0.0001	<0.0001
OGTT 2 h glucose (mmol/L)	6.12±1.13	8.48±1.30	5.95±1.10	9.49±1.64	<0.0001	<0.0001
Note: The Glucose concentrations of CON-E and GDM-E were OGTT results performed at 24-28 weeks, and were divided into potential GDM (GDM-E) and healthy controls (CON-E) according to the diagnosis.
