# Supplementary material for: Proteomic analysis of plasma total exosomes and placenta-derived exosomes in patients with gestational diabetes mellitus in the first and second trimesters
Source: Research Square preprint supplement (doi:10.21203/rs.3.rs-4946192/v1), 2024-10-16
Supplement: Supplementary file 4 [file 928c8dfc1e1b8bbe701ce22e.xlsx]

## Sheet: Table S3
Supplementary Table 3 The BPs associated with the DEPs of plasma total exosome at 12-16 weeks of gestation.
#term ID	Term description	Observed gene count	Background gene count	Strength	False discovery rate	Matching proteins
GO:0002576	Platelet degranulation	8	129	1.55	9.28e-07	HRG,ORM1,THBS1,PF4,CLU,PROS1,ORM2,WDR1
GO:0002682	Regulation of immune system process	16	1514	0.78	6.44e-06	LBP,HRG,C4BPB,CRP,ORM1,THBS1,HPX,PIP,VCAM1,PF4,CLU,CFHR4,CD5L,PROS1,ITGB1,ORM2
GO:0002920	Regulation of humoral immune response	6	75	1.66	2.17e-05	C4BPB,HPX,CLU,CFHR4,CD5L,PROS1
GO:0006952	Defense response	14	1296	0.79	4.01e-05	LBP,GAPDH,HRG,C4BPB,CRP,ORM1,THBS1,VCAM1,PF4,CLU,SERPINC1,CD5L,ITGB1,ORM2
GO:0016192	Vesicle-mediated transport	16	1805	0.71	4.01e-05	LBP,HRG,CRP,ORM1,THBS1,HPX,PF4,RAB1B,CLU,HBB,CD5L,PROS1,ITGB1,ORM2,WDR1,SPTB
GO:0032760	Positive regulation of tumor necrosis factor production	6	88	1.59	4.01e-05	LBP,ORM1,THBS1,PF4,CLU,ORM2
GO:0030449	Regulation of complement activation	5	56	1.71	0.0001	C4BPB,CLU,CFHR4,CD5L,PROS1
GO:0002376	Immune system process	17	2481	0.6	0.00023	LBP,GAPDH,HRG,C4BPB,CRP,ORM1,THBS1,VCAM1,PF4,CLU,HBB,SERPINC1,CD5L,PROS1,ITGB1,ORM2,WDR1
GO:0006954	Inflammatory response	9	515	1	0.00024	LBP,CRP,ORM1,THBS1,PF4,CLU,SERPINC1,CD5L,ORM2
GO:0002526	Acute inflammatory response	5	74	1.59	0.00025	LBP,CRP,ORM1,SERPINC1,ORM2
GO:0050776	Regulation of immune response	11	896	0.85	0.00025	LBP,HRG,C4BPB,CRP,HPX,VCAM1,CLU,CFHR4,CD5L,PROS1,ITGB1
GO:0006953	Acute-phase response	4	44	1.72	0.0011	LBP,CRP,ORM1,ORM2
GO:0006955	Immune response	13	1588	0.67	0.0011	LBP,GAPDH,HRG,C4BPB,CRP,ORM1,THBS1,VCAM1,PF4,CLU,HBB,SERPINC1,ORM2
GO:0045055	Regulated exocytosis	9	697	0.87	0.0017	HRG,ORM1,THBS1,PF4,CLU,HBB,PROS1,ORM2,WDR1
GO:0006950	Response to stress	18	3485	0.47	0.0028	LBP,GAPDH,HRG,C4BPB,CRP,ORM1,THBS1,VCAM1,PF4,CLU,HBB,TPM1,SERPINC1,CD5L,GPX3,PROS1,ITGB1,ORM2
GO:0010951	Negative regulation of endopeptidase activity	6	248	1.14	0.003	GAPDH,HRG,THBS1,PZP,SERPINC1,PROS1
GO:0061041	Regulation of wound healing	5	140	1.31	0.0031	HRG,THBS1,SERPINC1,PROS1,ITGB1
GO:0002697	Regulation of immune effector process	7	418	0.98	0.0039	LBP,C4BPB,HPX,CLU,CFHR4,CD5L,PROS1
GO:0006959	Humoral immune response	6	275	1.1	0.0042	GAPDH,HRG,C4BPB,CRP,PF4,CLU
GO:0042060	Wound healing	7	439	0.96	0.0049	HRG,C4BPB,PF4,HBB,TPM1,SERPINC1,PROS1
GO:0046903	Secretion	10	1097	0.72	0.0058	HRG,ORM1,THBS1,PF4,CLU,HBB,SERPINC1,PROS1,ORM2,WDR1
GO:0001819	Positive regulation of cytokine production	7	461	0.94	0.006	LBP,GAPDH,ORM1,THBS1,PF4,CLU,ORM2
GO:0007596	Blood coagulation	6	303	1.06	0.006	HRG,C4BPB,PF4,HBB,SERPINC1,PROS1
GO:0009605	Response to external stimulus	14	2310	0.54	0.006	LBP,PON1,GAPDH,HRG,ENO1,C4BPB,CRP,THBS1,VCAM1,PF4,CLU,SERPINC1,CSH2,SPTB
GO:0030193	Regulation of blood coagulation	4	80	1.46	0.006	HRG,THBS1,SERPINC1,PROS1
GO:0048518	Positive regulation of biological process	23	6112	0.34	0.006	LBP,PON1,GAPDH,HRG,ENO1,C4BPB,CRP,ORM1,THBS1,NID1,HPX,PIP,VCAM1,PF4,RAB1B,CLU,HBB,TPM1,CD5L,CSH2,ITGB1,ORM2,WDR1
GO:0050900	Leukocyte migration	6	316	1.04	0.006	LBP,VCAM1,PF4,PROS1,ITGB1,WDR1
GO:0051873	Killing by host of symbiont cells	3	27	1.81	0.0063	GAPDH,HRG,PF4
GO:0006810	Transport	19	4353	0.4	0.0072	LBP,HRG,CRP,ORM1,THBS1,HPX,PIP,PF4,RAB1B,CLU,HBB,CFHR4,SERPINC1,CD5L,PROS1,ITGB1,ORM2,WDR1,SPTB
GO:0051702	Interaction with symbiont	4	93	1.39	0.0073	GAPDH,HRG,CRP,PF4
GO:0050878	Regulation of body fluid levels	7	509	0.9	0.0075	HRG,C4BPB,THBS1,PF4,HBB,SERPINC1,PROS1
GO:0002684	Positive regulation of immune system process	9	949	0.74	0.0079	LBP,HRG,C4BPB,CRP,THBS1,HPX,VCAM1,PF4,CLU
GO:0006928	Movement of cell or subcellular component	11	1501	0.63	0.0088	LBP,THBS1,VCAM1,PF4,TPM4,TPM1,PROS1,ITGB1,PSG2,WDR1,SPTB
GO:0001817	Regulation of cytokine production	8	742	0.79	0.0092	LBP,GAPDH,CRP,ORM1,THBS1,PF4,CLU,ORM2
GO:0030162	Regulation of proteolysis	8	747	0.79	0.0092	GAPDH,HRG,ENO1,THBS1,PZP,CLU,SERPINC1,PROS1
GO:0040011	Locomotion	10	1251	0.66	0.0092	LBP,HRG,THBS1,VCAM1,PF4,PROS1,ITGB1,PSG2,WDR1,SPTB
GO:0050789	Regulation of biological process	31	11475	0.19	0.0092	LBP,PON1,GAPDH,LAMA4,HRG,ENO1,C4BPB,CRP,ORM1,THBS1,PZP,NID1,HPX,PIP,VCAM1,PF4,RAB1B,CLU,ZNF77,HBB,TPM1,CFHR4,SERPINC1,CD5L,CSH2,PROS1,ITGB1,ORM2,WDR1,SPTB,RNF213
GO:0051239	Regulation of multicellular organismal process	16	3227	0.46	0.0092	LBP,GAPDH,LAMA4,HRG,ENO1,CRP,ORM1,THBS1,PF4,CLU,TPM1,SERPINC1,PROS1,ITGB1,ORM2,WDR1
GO:2000379	Positive regulation of reactive oxygen species metabolic process	4	103	1.35	0.0092	CRP,THBS1,CLU,HBB
GO:2001027	Negative regulation of endothelial cell chemotaxis	2	4	2.46	0.0102	HRG,THBS1
GO:0006958	Complement activation, classical pathway	3	38	1.66	0.0112	C4BPB,CRP,CLU
GO:0044419	Interspecies interaction between organisms	12	1899	0.56	0.0112	LBP,GAPDH,HRG,ENO1,C4BPB,CRP,HPX,VCAM1,PF4,RAB1B,CLU,ITGB1
GO:0045214	Sarcomere organization	3	40	1.64	0.0122	TPM1,ITGB1,WDR1
GO:0051179	Localization	21	5591	0.33	0.0124	LBP,HRG,CRP,ORM1,THBS1,HPX,PIP,VCAM1,PF4,RAB1B,CLU,HBB,CFHR4,SERPINC1,CD5L,PROS1,ITGB1,PSG2,ORM2,WDR1,SPTB
GO:0001775	Cell activation	9	1075	0.68	0.0147	LBP,HRG,ORM1,VCAM1,PF4,CLU,HBB,ITGB1,ORM2
GO:0002443	Leukocyte mediated immunity	7	641	0.8	0.0207	C4BPB,CRP,ORM1,CLU,HBB,ORM2,WDR1
GO:0016477	Cell migration	8	896	0.71	0.0237	LBP,THBS1,VCAM1,PF4,PROS1,ITGB1,PSG2,WDR1
GO:0098542	Defense response to other organism	8	900	0.71	0.0241	LBP,GAPDH,HRG,C4BPB,CRP,VCAM1,PF4,CLU
GO:0006968	Cellular defense response	3	54	1.5	0.0244	LBP,CD5L,ITGB1
GO:0050896	Response to stimulus	25	8046	0.25	0.0244	LBP,PON1,GAPDH,HRG,ENO1,C4BPB,CRP,ORM1,THBS1,NID1,PIP,VCAM1,PF4,RAB1B,CLU,HBB,TPM1,SERPINC1,CD5L,GPX3,CSH2,PROS1,ITGB1,ORM2,SPTB
GO:0051240	Positive regulation of multicellular organismal process	11	1770	0.55	0.0244	LBP,GAPDH,HRG,ENO1,ORM1,THBS1,PF4,CLU,TPM1,ITGB1,ORM2
GO:0065008	Regulation of biological quality	17	4042	0.38	0.0244	GAPDH,LAMA4,HRG,C4BPB,CRP,THBS1,HPX,PIP,PF4,CLU,HBB,TPM1,SERPINC1,PROS1,ITGB1,WDR1,SPTB
GO:0008228	Opsonization	2	9	2.11	0.0273	LBP,CRP
GO:0015886	Heme transport	2	9	2.11	0.0273	HRG,HPX
GO:0002040	Sprouting angiogenesis	3	59	1.47	0.0281	THBS1,ITGB1,RNF213
GO:0090303	Positive regulation of wound healing	3	59	1.47	0.0281	HRG,THBS1,ITGB1
GO:0048583	Regulation of response to stimulus	17	4114	0.38	0.0283	LBP,HRG,ENO1,C4BPB,CRP,THBS1,HPX,VCAM1,PF4,CLU,CFHR4,SERPINC1,CD5L,CSH2,PROS1,ITGB1,RNF213
GO:0019730	Antimicrobial humoral response	4	160	1.16	0.0289	GAPDH,HRG,PF4,CLU
GO:0051918	Negative regulation of fibrinolysis	2	10	2.06	0.0302	HRG,THBS1
GO:0002252	Immune effector process	8	969	0.68	0.0327	LBP,C4BPB,CRP,ORM1,CLU,HBB,ORM2,WDR1
GO:0051707	Response to other organism	9	1256	0.62	0.0347	LBP,GAPDH,HRG,ENO1,C4BPB,CRP,VCAM1,PF4,CLU
GO:0002923	Regulation of humoral immune response mediated by circulating immunoglobulin	2	12	1.98	0.0392	C4BPB,HPX
GO:0010755	Regulation of plasminogen activation	2	12	1.98	0.0392	ENO1,THBS1
GO:0030198	Extracellular matrix organization	5	338	0.93	0.0417	LAMA4,THBS1,NID1,VCAM1,ITGB1
GO:0010763	Positive regulation of fibroblast migration	2	14	1.91	0.0462	THBS1,ITGB1

## Sheet: Table S4
Supplementary Table 4 The CCs associated with the DEPs of plasma total exosome at 12-16 weeks of gestation.
#term ID	Term description	Observed gene count	Background gene count	Strength	False discovery rate	Matching proteins
GO:0005615	Extracellular space	28	3195	0.7	8.27e-14	LBP,PON1,GAPDH,LAMA4,HRG,ENO1,C4BPB,CRP,ORM1,THBS1,PZP,NID1,HPX,PIP,VCAM1,PF4,RAB1B,CLU,HBB,TPM4,SERPINC1,CD5L,GPX3,CSH2,PROS1,ITGB1,ORM2,WDR1
GO:0005576	Extracellular region	30	4166	0.62	1.06e-13	LBP,PON1,GAPDH,LAMA4,HRG,ENO1,C4BPB,CRP,ORM1,THBS1,PZP,NID1,HPX,PIP,VCAM1,PF4,RAB1B,CLU,HBB,TPM4,CFHR4,SERPINC1,CD5L,GPX3,CSH2,PROS1,ITGB1,PSG2,ORM2,WDR1
GO:0072562	Blood microparticle	11	115	1.74	1.06e-13	PON1,HRG,ORM1,PZP,HPX,CLU,HBB,SERPINC1,CD5L,PROS1,ORM2
GO:0043230	Extracellular organelle	24	2126	0.81	1.52e-13	LBP,PON1,GAPDH,LAMA4,HRG,ENO1,ORM1,THBS1,PZP,NID1,HPX,PIP,VCAM1,PF4,RAB1B,CLU,HBB,TPM4,SERPINC1,GPX3,PROS1,ITGB1,ORM2,WDR1
GO:0070062	Extracellular exosome	23	2099	0.8	1.65e-12	LBP,PON1,GAPDH,LAMA4,HRG,ENO1,ORM1,THBS1,PZP,NID1,HPX,PIP,VCAM1,RAB1B,CLU,HBB,TPM4,SERPINC1,GPX3,PROS1,ITGB1,ORM2,WDR1
GO:0031982	Vesicle	25	3879	0.57	5.42e-09	LBP,PON1,GAPDH,LAMA4,HRG,ENO1,ORM1,THBS1,PZP,NID1,HPX,PIP,VCAM1,PF4,RAB1B,CLU,HBB,TPM4,SERPINC1,GPX3,CSH2,PROS1,ITGB1,ORM2,WDR1
GO:0031093	Platelet alpha granule lumen	7	68	1.77	9.48e-09	HRG,ORM1,THBS1,PF4,CLU,PROS1,ORM2
GO:0062023	Collagen-containing extracellular matrix	10	396	1.16	1.86e-07	LAMA4,HRG,ORM1,THBS1,NID1,HPX,PF4,CLU,SERPINC1,ORM2
GO:0009986	Cell surface	9	824	0.8	0.00099	LBP,HRG,ENO1,THBS1,VCAM1,CLU,CD5L,ITGB1,SPTB
GO:0005862	Muscle thin filament tropomyosin	2	4	2.46	0.0046	TPM4,TPM1
GO:0030141	Secretory granule	8	845	0.74	0.0082	HRG,ORM1,THBS1,PF4,CLU,HBB,PROS1,ORM2
GO:0034366	Spherical high-density lipoprotein particle	2	9	2.11	0.015	PON1,CLU
GO:0031410	Cytoplasmic vesicle	12	2386	0.46	0.038	HRG,ORM1,THBS1,HPX,VCAM1,PF4,RAB1B,CLU,HBB,PROS1,ITGB1,ORM2

## Sheet: Table S5
Supplementary Table 5 The KEGG pathways associated with the DEPs of plasma total exosome at 12-16 weeks of gestation.
#term ID	Term description	Observed gene count	Background gene count	Strength	False discovery rate	Matching proteins
hsa04610	Complement and coagulation cascades	5	82	1.55	0.00013	C4BPB,CLU,CFHR4,SERPINC1,PROS1
hsa05143	African trypanosomiasis	3	36	1.68	0.007	LAMA4,VCAM1,HBB
hsa05144	Malaria	3	46	1.57	0.0093	THBS1,VCAM1,HBB
hsa04512	ECM-receptor interaction	3	88	1.29	0.0438	LAMA4,THBS1,ITGB1
hsa05410	Hypertrophic cardiomyopathy	3	89	1.29	0.0438	TPM4,TPM1,ITGB1
hsa05414	Dilated cardiomyopathy	3	95	1.26	0.0438	TPM4,TPM1,ITGB1

## Sheet: Table S6
Supplementary Table 6 The Reactome pathways associated with the DEPs of plasma total exosome at 12-16 weeks of gestation.
#term ID	Term description	Observed gene count	Background gene count	Strength	False discovery rate	Matching proteins
HSA-114608	Platelet degranulation	8	127	1.56	1.39e-07	HRG,ORM1,THBS1,PF4,CLU,PROS1,ORM2,WDR1
HSA-109582	Hemostasis	12	605	1.06	1.79e-07	HRG,ORM1,THBS1,PF4,CLU,HBB,SERPINC1,PROS1,ITGB1,PSG2,ORM2,WDR1
HSA-166658	Complement cascade	5	57	1.7	3.03e-05	C4BPB,CRP,CLU,CFHR4,PROS1
HSA-977606	Regulation of Complement cascade	4	47	1.69	0.00064	C4BPB,CLU,CFHR4,PROS1
HSA-140875	Common Pathway of Fibrin Clot Formation	3	22	1.89	0.0033	PF4,SERPINC1,PROS1
HSA-3000157	Laminin interactions	3	30	1.76	0.0068	LAMA4,NID1,ITGB1
HSA-168249	Innate Immune System	9	1025	0.7	0.0117	LBP,C4BPB,CRP,ORM1,CLU,HBB,CFHR4,PROS1,ORM2
HSA-168256	Immune System	12	1956	0.55	0.0133	LBP,C4BPB,CRP,ORM1,VCAM1,CLU,HBB,CFHR4,PROS1,ITGB1,ORM2,RNF213
HSA-202733	Cell surface interactions at the vascular wall	4	138	1.22	0.0187	PF4,PROS1,ITGB1,PSG2
HSA-1474244	Extracellular matrix organization	5	301	0.98	0.0281	LAMA4,THBS1,NID1,VCAM1,ITGB1
HSA-3000171	Non-integrin membrane-ECM interactions	3	59	1.47	0.0281	LAMA4,THBS1,ITGB1
HSA-2168880	Scavenging of heme from plasma	2	13	1.95	0.0438	HPX,HBB
