# Supplementary material for: Proteomic analysis of plasma total exosomes and placenta-derived exosomes in patients with gestational diabetes mellitus in the first and second trimesters
Source: Research Square preprint supplement (doi:10.21203/rs.3.rs-4946192/v1), 2024-10-16
Supplement: Supplementary file 5 [file 99a73b6ce92f1f366f05d9dc.xlsx]

## Sheet: Table S9
	Supplementary Table 9 The BPs associated with the DEPs of plasma placenta-derived exosomes at 12-16 weeks of gestation.
#term ID	Term description	Observed gene count	Background gene count	Strength	False discovery rate	Matching proteins in your network (labels)
GO:0006956	Complement activation	7	54	1.96	2.87e-08	C3,KRT1,C9,CLU,C7,CFH,IGHV3-43D
GO:0006959	Humoral immune response	10	275	1.41	2.87e-08	LTF,C3,KRT1,C9,FGB,FGA,CLU,C7,CFH,IGHV3-43D
GO:0002920	Regulation of humoral immune response	7	75	1.81	8.18e-08	C3,C9,HPX,CLU,C7,CFH,PROS1
GO:0042730	Fibrinolysis	5	20	2.24	6.84e-07	KRT1,FGB,FGA,FGG,PROS1
GO:0016192	Vesicle-mediated transport	16	1805	0.79	7.18e-07	LTF,C3,KRT1,A1BG,HPX,ITIH4,LRG1,FGB,FGA,CLU,HBA1,FGG,RASSF9,PROS1,KIF16B,IGHV3-43D
GO:0030449	Regulation of complement activation	6	56	1.87	7.18e-07	C3,C9,CLU,C7,CFH,PROS1
GO:0002576	Platelet degranulation	7	129	1.58	1.28e-06	A1BG,ITIH4,FGB,FGA,CLU,FGG,PROS1
GO:0045055	Regulated exocytosis	11	697	1.04	2.5e-06	LTF,C3,KRT1,A1BG,ITIH4,LRG1,FGB,FGA,CLU,FGG,PROS1
GO:0045087	Innate immune response	11	703	1.04	2.5e-06	LTF,C3,KRT1,C9,FGB,FGA,CLU,C7,CFH,KIF16B,IGHV3-43D
GO:0030193	Regulation of blood coagulation	6	80	1.72	2.68e-06	KRT1,FGB,FGA,FGG,SERPINC1,PROS1
GO:0006958	Complement activation, classical pathway	5	38	1.96	3.75e-06	C3,C9,CLU,C7,IGHV3-43D
GO:0006952	Defense response	13	1296	0.85	6.2e-06	LTF,C3,KRT1,C9,ITIH4,FGB,FGA,CLU,C7,CFH,SERPINC1,KIF16B,IGHV3-43D
GO:0006955	Immune response	14	1588	0.79	6.2e-06	LTF,C3,KRT1,A1BG,C9,LRG1,FGB,FGA,CLU,C7,CFH,SERPINC1,KIF16B,IGHV3-43D
GO:0006957	Complement activation, alternative pathway	4	13	2.33	6.2e-06	C3,C9,C7,CFH
GO:0046903	Secretion	12	1097	0.88	8.15e-06	LTF,C3,KRT1,A1BG,ITIH4,LRG1,FGB,FGA,CLU,FGG,SERPINC1,PROS1
GO:0051707	Response to other organism	12	1256	0.82	2.81e-05	LTF,C3,KRT1,C9,LRG1,FGB,FGA,CLU,C7,CFH,KIF16B,IGHV3-43D
GO:0002443	Leukocyte mediated immunity	9	641	0.99	6.27e-05	LTF,C3,KRT1,A1BG,C9,LRG1,CLU,C7,IGHV3-43D
GO:0002376	Immune system process	15	2481	0.63	8.95e-05	LTF,C3,KRT1,A1BG,C9,LRG1,FGB,FGA,CLU,C7,CFH,SERPINC1,PROS1,KIF16B,IGHV3-43D
GO:0002250	Adaptive immune response	7	317	1.19	9.17e-05	C3,C9,FGB,FGA,CLU,C7,IGHV3-43D
GO:0002252	Immune effector process	10	969	0.86	0.00017	LTF,C3,KRT1,A1BG,C9,LRG1,CLU,C7,CFH,IGHV3-43D
GO:0006950	Response to stress	17	3485	0.53	0.00017	SERPIND1,LTF,C3,KRT1,C9,ITIH4,FGB,FGA,CLU,C7,HBA1,FGG,CFH,SERPINC1,PROS1,KIF16B,IGHV3-43D
GO:0044419	Interspecies interaction between organisms	13	1899	0.68	0.00019	LTF,C3,KRT1,C9,HPX,LRG1,FGB,FGA,CLU,C7,CFH,KIF16B,IGHV3-43D
GO:0009605	Response to external stimulus	14	2310	0.63	0.00024	SERPIND1,LTF,C3,KRT1,C9,LRG1,FGB,FGA,CLU,C7,CFH,SERPINC1,KIF16B,IGHV3-43D
GO:0031639	Plasminogen activation	3	11	2.28	0.00027	FGB,FGA,FGG
GO:0050778	Positive regulation of immune response	8	607	0.96	0.00044	C3,KRT1,C9,HPX,CLU,C7,CFH,IGHV3-43D
GO:0002697	Regulation of immune effector process	7	418	1.07	0.00046	C3,C9,HPX,CLU,C7,CFH,PROS1
GO:0034116	Positive regulation of heterotypic cell-cell adhesion	3	16	2.12	0.00062	FGB,FGA,FGG
GO:0050776	Regulation of immune response	9	896	0.85	0.00067	C3,KRT1,C9,HPX,CLU,C7,CFH,PROS1,IGHV3-43D
GO:0007596	Blood coagulation	6	303	1.14	0.00095	SERPIND1,FGB,FGA,FGG,SERPINC1,PROS1
GO:0048584	Positive regulation of response to stimulus	13	2257	0.6	0.001	LTF,C3,KRT1,C9,HPX,LRG1,FGB,FGA,CLU,C7,FGG,CFH,IGHV3-43D
GO:0050878	Regulation of body fluid levels	7	509	0.98	0.0013	SERPIND1,KRT1,FGB,FGA,FGG,SERPINC1,PROS1
GO:0030162	Regulation of proteolysis	8	747	0.87	0.0015	SERPIND1,LTF,C3,ITIH4,ITIH1,CLU,SERPINC1,PROS1
GO:0032101	Regulation of response to external stimulus	9	1013	0.79	0.0016	LTF,C3,KRT1,HPX,FGB,FGA,FGG,SERPINC1,PROS1
GO:0051649	Establishment of localization in cell	13	2375	0.58	0.0016	LTF,C3,KRT1,A1BG,ITIH4,LRG1,FGB,FGA,CLU,FGG,RASSF9,PROS1,KIF16B
GO:0072378	Blood coagulation, fibrin clot formation	3	26	1.91	0.0018	FGB,FGA,FGG
GO:0001775	Cell activation	9	1075	0.77	0.0023	LTF,C3,KRT1,A1BG,LRG1,FGB,FGA,CLU,FGG
GO:0032102	Negative regulation of response to external stimulus	6	367	1.06	0.0023	LTF,KRT1,FGB,FGA,FGG,PROS1
GO:2000257	Regulation of protein activation cascade	2	2	2.84	0.0023	FGA,SERPINC1
GO:2000352	Negative regulation of endothelial cell apoptotic process	3	29	1.86	0.0023	FGB,FGA,FGG
GO:0006810	Transport	17	4353	0.44	0.0024	LTF,C3,KRT1,A1BG,HPX,ITIH4,LRG1,FGB,FGA,CLU,HBA1,FGG,RASSF9,SERPINC1,PROS1,KIF16B,IGHV3-43D
GO:0051248	Negative regulation of protein metabolic process	9	1096	0.76	0.0026	SERPIND1,LTF,C3,ITIH4,ITIH1,FGA,CLU,SERPINC1,PROS1
GO:0045907	Positive regulation of vasoconstriction	3	32	1.82	0.0029	FGB,FGA,FGG
GO:1900026	Positive regulation of substrate adhesion-dependent cell spreading	3	38	1.74	0.0046	FGB,FGA,FGG
GO:0002682	Regulation of immune system process	10	1514	0.66	0.0047	LTF,C3,KRT1,C9,HPX,CLU,C7,CFH,PROS1,IGHV3-43D
GO:1902042	Negative regulation of extrinsic apoptotic signaling pathway via death domain receptors	3	39	1.73	0.0048	FGB,FGA,FGG
GO:0070527	Platelet aggregation	3	42	1.7	0.0058	FGB,FGA,FGG
GO:0043152	Induction of bacterial agglutination	2	6	2.37	0.0085	FGB,FGA
GO:0050896	Response to stimulus	22	8046	0.28	0.0094	KRT14,SERPIND1,LTF,C3,KRT1,A1BG,C9,ITIH4,LRG1,FGB,FGA,CLU,C7,HBA1,FGG,RASSF9,CFH,SERPINC1,PROS1,KIF16B,DCDC1,IGHV3-43D
GO:0019730	Antimicrobial humoral response	4	160	1.24	0.0122	LTF,FGB,FGA,CLU
GO:0019731	Antibacterial humoral response	3	59	1.55	0.0133	LTF,FGB,FGA
GO:0080134	Regulation of response to stress	9	1437	0.64	0.0163	C3,KRT1,HPX,FGB,FGA,CLU,FGG,SERPINC1,PROS1
GO:0043687	Post-translational protein modification	5	360	0.99	0.0202	SERPIND1,C3,FGA,FGG,SERPINC1
GO:0048583	Regulation of response to stimulus	15	4114	0.41	0.0205	LTF,C3,KRT1,C9,HPX,LRG1,FGB,FGA,CLU,C7,FGG,CFH,SERPINC1,PROS1,IGHV3-43D
GO:0002274	Myeloid leukocyte activation	6	585	0.86	0.0206	LTF,C3,KRT1,A1BG,LRG1,CLU
GO:0032268	Regulation of cellular protein metabolic process	12	2693	0.49	0.0212	SERPIND1,LTF,C3,HPX,ITIH4,ITIH1,FGB,FGA,CLU,FGG,SERPINC1,PROS1
GO:1901678	Iron coordination entity transport	2	13	2.03	0.026	LTF,HPX
GO:0009617	Response to bacterium	6	634	0.82	0.0305	LTF,C3,LRG1,FGB,FGA,IGHV3-43D
GO:0051258	Protein polymerization	3	87	1.38	0.0349	FGB,FGA,FGG
GO:0051604	Protein maturation	4	225	1.09	0.0362	FGB,FGA,NAA20,FGG
GO:0002922	Positive regulation of humoral immune response	2	17	1.91	0.0398	C3,HPX
GO:0045921	Positive regulation of exocytosis	3	92	1.36	0.0398	FGB,FGA,FGG
GO:0090083	Regulation of inclusion body assembly	2	17	1.91	0.0398	CLU,SACS
GO:2001234	Negative regulation of apoptotic signaling pathway	4	232	1.08	0.0398	FGB,FGA,CLU,FGG
GO:0002224	Toll-like receptor signaling pathway	3	100	1.32	0.0482	FGB,FGA,FGG
GO:0090277	Positive regulation of peptide hormone secretion	3	100	1.32	0.0482	FGB,FGA,FGG

## Sheet: Table S10
	Supplementary Table 10 The CCs associated with the DEPs of plasma placenta-derived exosomes at 12-16 weeks of gestation.
#term ID	Term description	Observed gene count	Background gene count	Strength	False discovery rate	Matching proteins in your network (labels)
GO:0072562	Blood microparticle	16	115	1.99	2.99e-25	C3,KRT1,A1BG,C9,HPX,ITIH4,ITIH1,FGB,FGA,PRSS1,CLU,HBA1,FGG,CFH,SERPINC1,PROS1
GO:0005615	Extracellular space	24	3195	0.72	1.22e-12	KRT14,SERPIND1,LTF,C3,KRT1,A1BG,C9,HPX,ITIH4,ITIH1,HABP2,LRG1,FGB,FGA,PRSS1,CLU,C7,HBA1,FGG,RASSF9,CFH,SERPINC1,PROS1,IGHV3-43D
GO:0070062	Extracellular exosome	21	2099	0.84	1.51e-12	KRT14,SERPIND1,LTF,C3,KRT1,A1BG,C9,HPX,ITIH4,ITIH1,LRG1,FGB,FGA,CLU,C7,HBA1,FGG,RASSF9,CFH,SERPINC1,PROS1
GO:0062023	Collagen-containing extracellular matrix	11	396	1.29	1.03e-09	KRT1,A1BG,HPX,ITIH4,ITIH1,FGB,FGA,PRSS1,CLU,FGG,SERPINC1
GO:0034774	Secretory granule lumen	10	324	1.33	3.85e-09	LTF,C3,A1BG,ITIH4,LRG1,FGB,FGA,CLU,FGG,PROS1
GO:0031982	Vesicle	22	3879	0.6	5.97e-09	KRT14,SERPIND1,LTF,C3,KRT1,A1BG,C9,HPX,ITIH4,ITIH1,LRG1,FGB,FGA,CLU,C7,HBA1,FGG,RASSF9,CFH,SERPINC1,PROS1,KIF16B
GO:0031093	Platelet alpha granule lumen	6	68	1.79	1.09e-07	A1BG,FGB,FGA,CLU,FGG,PROS1
GO:0030141	Secretory granule	11	845	0.96	1.28e-06	LTF,C3,KRT1,A1BG,ITIH4,LRG1,FGB,FGA,CLU,FGG,PROS1
GO:0031410	Cytoplasmic vesicle	15	2386	0.64	1.58e-05	LTF,C3,KRT1,A1BG,HPX,ITIH4,LRG1,FGB,FGA,CLU,HBA1,FGG,RASSF9,PROS1,KIF16B
GO:0005577	Fibrinogen complex	3	8	2.42	3.83e-05	FGB,FGA,FGG
GO:0005788	Endoplasmic reticulum lumen	6	308	1.13	0.00038	SERPIND1,C3,FGA,CLU,FGG,SERPINC1
GO:0071682	Endocytic vesicle lumen	3	20	2.02	0.00038	LTF,HPX,HBA1
GO:0005579	Membrane attack complex	2	7	2.3	0.0054	C9,C7
GO:0009986	Cell surface	7	824	0.77	0.0096	LTF,C3,FGB,FGA,CLU,FGG,IGHV3-43D
GO:0012505	Endomembrane system	15	4542	0.36	0.0347	SERPIND1,LTF,C3,KRT1,A1BG,ITIH4,LRG1,FGB,FGA,CLU,FGG,RASSF9,SERPINC1,PROS1,KIF16B

## Sheet: Table S11
Supplementary Table 11 The KEGG pathways associated with the DEPs of plasma placenta-derived exosomes at 12-16 weeks of gestation.
#term ID	Term description	Observed gene count	Background gene count	Strength	False discovery rate	Matching proteins in your network (labels)
hsa04610	Complement and coagulation cascades	11	82	1.97	1.01e-16	SERPIND1,C3,C9,FGB,FGA,CLU,C7,FGG,CFH,SERPINC1,PROS1
hsa05150	Staphylococcus aureus infection	4	86	1.51	0.0013	KRT14,C3,FGG,CFH
hsa05322	Systemic lupus erythematosus	3	93	1.35	0.0383	C3,C9,C7

## Sheet: Table S12
	Supplementary Table 12 The Reactome pathways associated with the DEPs of plasma placenta-derived exosomes at 12-16 weeks of gestation.
#term ID	Term description	Observed gene count	Background gene count	Strength	False discovery rate	Matching proteins in your network (labels)
HSA-140875	Common Pathway of Fibrin Clot Formation	6	22	2.28	3.84e-09	SERPIND1,FGB,FGA,FGG,SERPINC1,PROS1
HSA-977606	Regulation of Complement cascade	6	47	1.95	7.62e-08	C3,C9,CLU,C7,CFH,PROS1
HSA-168249	Innate Immune System	13	1025	0.95	1.86e-07	LTF,C3,KRT1,A1BG,C9,LRG1,FGB,FGA,CLU,C7,FGG,CFH,PROS1
HSA-114608	Platelet degranulation	7	127	1.59	2.27e-07	A1BG,ITIH4,FGB,FGA,CLU,FGG,PROS1
HSA-109582	Hemostasis	10	605	1.06	1.85e-06	SERPIND1,A1BG,ITIH4,FGB,FGA,CLU,FGG,SERPINC1,PROS1,KIF16B
HSA-166665	Terminal pathway of complement	3	8	2.42	9.29e-05	C9,CLU,C7
HSA-8957275	Post-translational protein phosphorylation	5	107	1.51	9.75e-05	SERPIND1,C3,FGA,FGG,SERPINC1
HSA-381426	Regulation of Insulin-like Growth Factor (IGF) transport and uptake by Insulin-like Growth Factor Binding Proteins (IGFBPs)	5	124	1.45	0.00017	SERPIND1,C3,FGA,FGG,SERPINC1
HSA-354194	GRB2:SOS provides linkage to MAPK signaling for Integrins	3	15	2.15	0.00033	FGB,FGA,FGG
HSA-372708	p130Cas linkage to MAPK signaling for integrins	3	15	2.15	0.00033	FGB,FGA,FGG
HSA-5686938	Regulation of TLR by endogenous ligand	3	19	2.04	0.00054	FGB,FGA,FGG
HSA-140837	Intrinsic Pathway of Fibrin Clot Formation	3	23	1.96	0.00085	SERPIND1,SERPINC1,PROS1
HSA-6802948	Signaling by high-kinase activity BRAF mutants	3	36	1.77	0.0026	FGB,FGA,FGG
HSA-5674135	MAP2K and MAPK activation	3	40	1.72	0.0032	FGB,FGA,FGG
HSA-9656223	Signaling by RAF1 mutants	3	41	1.71	0.0033	FGB,FGA,FGG
HSA-6802946	Signaling by moderate kinase activity BRAF mutants	3	45	1.67	0.0041	FGB,FGA,FGG
HSA-6802955	Paradoxical activation of RAF signaling by kinase inactive BRAF	3	45	1.67	0.0041	FGB,FGA,FGG
HSA-9649948	Signaling downstream of RAS mutants	3	45	1.67	0.0041	FGB,FGA,FGG
HSA-6802952	Signaling by BRAF and RAF fusions	3	65	1.51	0.0099	FGB,FGA,FGG
HSA-2168880	Scavenging of heme from plasma	2	13	2.03	0.0159	HPX,HBA1
HSA-216083	Integrin cell surface interactions	3	85	1.39	0.0191	FGB,FGA,FGG
HSA-6798695	Neutrophil degranulation	5	473	0.87	0.0366	LTF,C3,KRT1,A1BG,LRG1

## Sheet: Tbale S13
	Supplementary Table 13 The Wiki pathways associated with the DEPs of plasma placenta-derived exosomes at 12-16 weeks of gestation.
#term ID	Term description	Observed gene count	Background gene count	Strength	False discovery rate	Matching proteins in your network (labels)
WP558	Complement and coagulation cascades	9	58	2.04	1.63e-13	SERPIND1,C3,C9,FGB,CLU,C7,CFH,SERPINC1,PROS1
WP2806	Complement system	8	97	1.76	5e-10	C3,C9,FGB,FGA,C7,FGG,CFH,PROS1
WP5090	Complement system in neuronal development and plasticity	6	105	1.6	2.22e-06	C3,C9,CLU,C7,CFH,PROS1
WP4927	COVID-19, thrombosis and anticoagulation	3	7	2.48	5.28e-05	FGB,FGA,FGG
WP272	Blood clotting cascade	3	23	1.96	0.0008	FGB,FGA,FGG
WP545	Complement activation	3	22	1.98	0.0008	C3,C9,C7
WP4136	Fibrin complement receptor 3 signaling pathway	3	41	1.71	0.0032	FGB,FGA,FGG
WP176	Folate metabolism	3	69	1.48	0.0124	FGB,FGA,FGG
WP15	Selenium micronutrient network	3	86	1.39	0.0206	FGB,FGA,FGG
WP2328	Allograft Rejection	3	89	1.37	0.0206	C3,C9,C7
WP4493	Cells and molecules involved in local acute inflammatory response	2	17	1.91	0.0206	C3,C7
