# Supplementary material for: Proteomic analysis of plasma total exosomes and placenta-derived exosomes in patients with gestational diabetes mellitus in the first and second trimesters
Source: Research Square preprint supplement (doi:10.21203/rs.3.rs-4946192/v1), 2024-10-16
Supplement: Supplementary file 6 [file a2b5b0200cf2688234abd76a.xlsx]

## Sheet: Table S14
Supplementary Table 14 The BPs associated with the DEPs of placenta-derived exosomes at 12-16 weeks of gestation.
GO_ID	GO_Name	Hit gene	Background gene	Pvalue_adjusted	Genes
GO:0006959	Humoral immune response	11	668	3.13e-16	JCHAIN, IGHV4-59, IGKV3D-20, IGKC, IGKV3-20, IGHA1, CD5L, IGHV3-15, IGHG1, C8B, IGHV5-51
GO:0006956	Complement activation	10	418	3.13e-16	IGHV4-59, IGKV3D-20, IGKC, IGKV3-20, IGHA1, CD5L, IGHV3-15, IGHG1, C8B, IGHV5-51
GO:0006958	Complement activation, classical pathway	9	322	3.7e-15	IGHV4-59, IGKV3D-20, IGKC, IGKV3-20, IGHA1, IGHV3-15, IGHG1, C8B, IGHV5-51
GO:0002455	Humoral immune response mediated by circulating immunoglobulin	9	348	5.62e-15	IGHV4-59, IGKV3D-20, IGKC, IGKV3-20, IGHA1, IGHV3-15, IGHG1, C8B, IGHV5-51
GO:0072376	Protein activation cascade	9	434	2.77e-14	IGHV4-59, IGKV3D-20, IGKC, IGKV3-20, IGHA1, IGHV3-15, IGHG1, C8B, IGHV5-51
GO:0006897	Endocytosis	12	1682	2.77e-14	AMBP, JCHAIN, IGHV4-59, IGKV3D-20, IGKC, IGKV3-20, IGHA1, CD5L, LPA, IGHV3-15, IGHG1, IGHV5-51
GO:0016064	Immunoglobulin mediated immune response	9	447	2.77e-14	IGHV4-59, IGKV3D-20, IGKC, IGKV3-20, IGHA1, IGHV3-15, IGHG1, C8B, IGHV5-51
GO:0019724	B cell mediated immunity	9	452	2.77e-14	IGHV4-59, IGKV3D-20, IGKC, IGKV3-20, IGHA1, IGHV3-15, IGHG1, C8B, IGHV5-51
GO:0002250	Adaptive immune response	11	1179	2.77e-14	JCHAIN, IGKV1-27, IGHV4-59, IGKV3D-20, IGKC, IGKV3-20, IGHA1, IGHV3-15, IGHG1, C8B, IGHV5-51
GO:0098657	Import into cell	11	1332	9.44e-14	AMBP, JCHAIN, IGHV4-59, IGKV3D-20, IGKC, IGKV3-20, IGHA1, CD5L, IGHV3-15, IGHG1, IGHV5-51

## Sheet: Table S15
	Supplementary Table 15 The CCs associated with the DEPs of placenta-derived exosomes at 12-16 weeks of gestation.
GO_ID	GO_Name	Hit gene	Background gene	Pvalue_adjusted	Genes
GO:0019814	Immunoglobulin complex	10	182	5.86e-21	JCHAIN, IGKV1-27, IGHV4-59, IGKV3D-20, IGKC, IGKV3-20, IGHA1, IGHV3-15, IGHG1, IGHV5-51
GO:0005576	Extracellular region	19	7506	1.08e-19	AMBP, JCHAIN, SHBG, IGKV1-27, IGKV3-7, IGHV4-59, IGKV3D-20, PSG3, IGKC, IGKV3-20, PSG9, IGHA1, CD5L, LPA, KRT2, IGHV3-15, IGHG1, C8B, IGHV5-51
GO:0005615	Extracellular space	17	4370	1.64e-19	AMBP, JCHAIN, SHBG, IGKV1-27, IGKV3-7, IGHV4-59, IGKV3D-20, IGKC, IGKV3-20, IGHA1, CD5L, LPA, KRT2, IGHV3-15, IGHG1, C8B, IGHV5-51
GO:0042571	Immunoglobulin complex, circulating	8	98	2.02e-18	JCHAIN, IGHV4-59, IGKC, IGKV3-20, IGHA1, IGHV3-15, IGHG1, IGHV5-51
GO:0072562	Blood microparticle	9	223	3.93e-18	AMBP, JCHAIN, IGKC, IGKV3-20, IGHA1, CD5L, IGHV3-15, IGHG1, IGHV5-51
GO:0044421	Extracellular region part	17	5566	4.9e-18	AMBP, JCHAIN, SHBG, IGKV1-27, IGKV3-7, IGHV4-59, IGKV3D-20, IGKC, IGKV3-20, IGHA1, CD5L, LPA, KRT2, IGHV3-15, IGHG1, C8B,IGHV5-51
GO:0065010	Extracellular membrane-bounded organelle	11	2778	1.35e-11	AMBP, JCHAIN, SHBG, IGHV4-59, IGKC, IGKV3-20, IGHA1, CD5L, KRT2, IGHG1, C8B
GO:0070062	Extracellular exosome	11	2822	1.35e-11	AMBP, JCHAIN, SHBG, IGHV4-59, IGKC, IGKV3-20, IGHA1, CD5L, KRT2, IGHG1, C8B
GO:1903561	Extracellular vesicle	11	2843	1.35e-11	AMBP, JCHAIN, SHBG, IGHV4-59, IGKC, IGKV3-20, IGHA1, CD5L, KRT2, IGHG1, C8B
GO:0043230	Extracellular organelle	11	2849	1.35e-11	AMBP, JCHAIN, SHBG, IGHV4-59, IGKC, IGKV3-20, IGHA1, CD5L, KRT2, IGHG1, C8B
